# Supplementary material
Source: publisher figshare collection journal article supplement (https://frontiersin.figshare.com/ndownloader/files/20132702)
Supplement: Supplementary file 1 [file 20132702]

*Supplemental Information*

| <b>Sample #</b> | <b>Sample ID</b> | <b>Depth and Sample Mix Ratio</b>                                                    | <b>Amendments</b>                                                                                                                                      |
|-----------------|------------------|--------------------------------------------------------------------------------------|--------------------------------------------------------------------------------------------------------------------------------------------------------|
| 1a and 1b       | C1; C2           | 70:30 mix of 0.2 $\mu\text{m}$ filtered 1 m seawater and unfiltered water from 60 m. | Unamended control                                                                                                                                      |
| 2a and 2b       | L1; L2           | 70:30 mix of 0.2 $\mu\text{m}$ filtered 1 m seawater and unfiltered water from 60 m. | Lignin ( $10 \mu\text{mol L}^{-1}$ carbon)                                                                                                             |
| 3a and 3b       | LNP1; LNP2       | 70:30 mix of 0.2 $\mu\text{m}$ filtered 1 m seawater and unfiltered water from 60 m. | Lignin ( $10 \mu\text{mol L}^{-1}$ carbon)<br>Ammonium chloride ( $1 \mu\text{mol L}^{-1}$ )<br>Dipotassium phosphate ( $0.1 \mu\text{mol L}^{-1}$ )   |
| 4a and 4b       | GNP1; GNP2       | 70:30 mix of 0.2 $\mu\text{m}$ filtered 1 m seawater and unfiltered water from 60 m. | Glucose ( $10 \mu\text{mol L}^{-1}$ carbon),<br>Ammonium chloride ( $1 \mu\text{mol L}^{-1}$ )<br>Dipotassium phosphate ( $0.1 \mu\text{mol L}^{-1}$ ) |

**Table S1.** A description of the samples, their identification, the composition of seawater used and how each incubation was amended.

**Table S2.** Bacterioplankton abundance (Cells mL<sup>-1</sup>) averages and standard deviation for all time points (with time also indicated in days). Averages were calculated from replicate counts (n = 10).

| Time Point | T0       | T1       | T2       | T3       | T4       | T5       | T6       | T7       |
|------------|----------|----------|----------|----------|----------|----------|----------|----------|
| Days       | 0.0      | 0.6      | 0.9      | 1.6      | 1.91     | 2.63     | 2.91     | 3.63     |
| Average    |          |          |          |          |          |          |          |          |
| C1         | 1.79E+05 | 1.80E+05 | 1.71E+05 | 1.82E+05 | 2.23E+05 | 2.36E+05 | 2.79E+05 | 3.07E+05 |
| C2         | 1.96E+05 | 2.09E+05 | 1.77E+05 | 2.23E+05 | 2.16E+05 | 2.79E+05 | 2.74E+05 | 3.16E+05 |
| L1         | 1.62E+05 | 1.65E+05 | 1.63E+05 | 2.68E+05 | 2.68E+05 | 3.28E+05 | 3.29E+05 | 3.84E+05 |
| L2         | 1.72E+05 | 1.79E+05 | 1.69E+05 | 2.86E+05 | 3.12E+05 | 3.58E+05 | 4.03E+05 | 4.16E+05 |
| LNP1       | 1.87E+05 | 1.78E+05 | 2.14E+05 | 2.53E+05 | 2.87E+05 | 3.36E+05 | 3.32E+05 | 3.59E+05 |
| LNP2       | 2.10E+05 | 2.07E+05 | 2.02E+05 | 2.85E+05 | 3.79E+05 | 4.23E+05 | 5.23E+05 | 5.75E+05 |
| GNP1       | 1.74E+05 | 1.99E+05 | 8.03E+05 | 1.13E+06 | 1.14E+06 | 1.17E+06 | 1.14E+06 | 1.32E+06 |
| GNP2       | 1.88E+05 | 2.07E+05 | 8.53E+05 | 1.06E+06 | 1.03E+06 | 1.21E+06 | 1.09E+06 | 1.09E+06 |
| Std Dev    |          |          |          |          |          |          |          |          |
| C1         | 1.07E+04 | 1.43E+04 | 1.87E+04 | 2.36E+04 | 2.09E+04 | 2.30E+04 | 4.27E+04 | 4.62E+04 |
| C2         | 2.08E+04 | 1.73E+04 | 2.08E+04 | 2.10E+04 | 1.94E+04 | 2.71E+04 | 3.90E+04 | 4.06E+04 |
| L1         | 1.49E+04 | 1.29E+04 | 1.48E+04 | 2.30E+04 | 3.78E+04 | 2.88E+04 | 2.71E+04 | 4.93E+04 |
| L2         | 1.51E+04 | 1.53E+04 | 2.28E+04 | 4.77E+04 | 3.87E+04 | 2.44E+04 | 4.44E+04 | 6.36E+04 |
| LNP1       | 1.81E+04 | 1.59E+04 | 2.97E+04 | 2.17E+04 | 2.80E+04 | 2.54E+04 | 2.86E+04 | 4.36E+04 |
| LNP2       | 1.41E+04 | 2.01E+04 | 1.62E+04 | 2.93E+04 | 4.07E+04 | 4.98E+04 | 4.04E+04 | 5.47E+04 |
| GNP1       | 1.37E+04 | 1.83E+04 | 7.12E+04 | 1.25E+05 | 1.39E+05 | 1.04E+05 | 1.52E+05 | 1.81E+05 |
| GNP2       | 1.43E+04 | 1.88E+04 | 1.10E+05 | 6.68E+04 | 1.01E+05 | 1.83E+05 | 1.73E+05 | 1.04E+05 |

| Time Point | T8       | T9       | T10      | T11      | T12      | T13      | T14      | T15      |
|------------|----------|----------|----------|----------|----------|----------|----------|----------|
| Days       | 3.87     | 4.59     | 5.54     | 6.59     | 7.59     | 9.59     | 11.56    | 34.56    |
| Average    |          |          |          |          |          |          |          |          |
| C1         | 3.18E+05 | 3.27E+05 | 3.54E+05 | 3.55E+05 | 3.38E+05 | 3.48E+05 | 4.35E+05 | 4.51E+05 |
| C2         | 3.52E+05 | 3.33E+05 | 3.58E+05 | 3.48E+05 | 3.71E+05 | 3.30E+05 | 4.49E+05 | 4.31E+05 |
| L1         | 4.50E+05 | 4.99E+05 | 4.82E+05 | 4.86E+05 | 5.41E+05 | 5.24E+05 | 6.48E+05 | 5.43E+05 |
| L2         | 4.26E+05 | 4.91E+05 | 4.99E+05 | 4.88E+05 | 5.00E+05 | 5.35E+05 | 6.70E+05 | 5.81E+05 |
| LNP1       | 4.14E+05 | 5.26E+05 | 5.84E+05 | 5.85E+05 | 5.66E+05 | 5.22E+05 | 5.78E+05 | 4.07E+05 |
| LNP2       | 5.91E+05 | 7.13E+05 | 6.72E+05 | 5.65E+05 | 5.20E+05 | 5.96E+05 | 7.55E+05 | 4.53E+05 |
| GNP1       | 1.30E+06 | 1.17E+06 | 1.44E+06 | 1.15E+06 | 8.57E+05 | 8.85E+05 | 9.46E+05 | 1.02E+06 |
| GNP2       | 1.21E+06 | 1.21E+06 | 1.37E+06 | 1.01E+06 | 9.48E+05 | 8.79E+05 | 9.08E+05 | 9.18E+05 |
| Std Dev    |          |          |          |          |          |          |          |          |
| C1         | 3.53E+04 | 2.89E+04 | 3.72E+04 | 4.87E+04 | 1.63E+04 | 5.62E+04 | 4.74E+04 | 4.81E+04 |
| C2         | 4.61E+04 | 2.18E+04 | 3.06E+04 | 4.03E+04 | 3.79E+04 | 2.86E+04 | 5.28E+04 | 3.54E+04 |
| L1         | 4.29E+04 | 6.67E+04 | 4.89E+04 | 9.66E+04 | 6.28E+04 | 4.42E+04 | 8.18E+04 | 3.47E+04 |
| L2         | 3.83E+04 | 3.72E+04 | 9.10E+04 | 5.25E+04 | 6.78E+04 | 6.40E+04 | 5.86E+04 | 3.17E+04 |
| LNP1       | 5.77E+04 | 4.98E+04 | 5.35E+04 | 6.43E+04 | 9.15E+04 | 5.66E+04 | 8.04E+04 | 4.53E+04 |
| LNP2       | 4.09E+04 | 6.69E+04 | 1.03E+05 | 1.05E+05 | 9.71E+04 | 8.23E+04 | 1.10E+05 | 6.57E+04 |
| GNP1       | 1.12E+05 | 1.35E+05 | 1.83E+05 | 1.29E+05 | 1.02E+05 | 1.77E+05 | 7.95E+04 | 1.25E+05 |
| GNP2       | 1.02E+05 | 1.18E+05 | 2.23E+05 | 1.04E+05 | 1.29E+05 | 1.17E+05 | 9.39E+04 | 7.97E+04 |

*Hybridization Solutions:*

*Set 001: 0.9 M NaCl, 20 mM Tris/HCl pH 7.4, 35% formamide 0.01%, and SDS in 3.58 mL of Millipore de-ionized water.*

**Set 002:** 0.9 M NaCl, 20 mM Tris/HCl pH 7.4, 15% formamide and 0.01% SDS in 7.58 mL of Millipore de-ionized water.

*Hybridization washes:*

**Set 001:** 70 mM NaCl, 20 mM Tris/HCl pH 7.4, 15% formamide and 0.01% SDS in 934 mL of Millipore de-ionized water.

**Set 002:** 150 mM NaCl, 20 mM Tris/HCl pH 7.4, 5 mM EDTA and 0.01% SDS in 894 mL of Millipore de-ionized water.

**Table S3.** Table showing probes used for FISH (normal) and **CARD-FISH (bold)** in this project including their sequences, target species including class level and what % of hits are the target species according to the SILVA and RDP databases. Additional information on the % formamide used in the hybridization solution, the hybridization temperature (°C), the NaCl concentration (M) in the wash solution and the wash temperature (°C) are also included.

| Probe Name                  | DNA Sequence 5' to 3'     | Target<br>(Class Level)                         | SILVA (RDP)<br>Probe Hit<br>%Target/Total | %<br>Formamide | Hybridization<br>Temperature<br>°C | NaCl<br>Concentration<br>M | Wash<br>Temperature<br>°C |
|-----------------------------|---------------------------|-------------------------------------------------|-------------------------------------------|----------------|------------------------------------|----------------------------|---------------------------|
| 338F <sup>1</sup>           | TGAGGATGCCCTCCGTCG        | Non Specific                                    | 0.0 (0.0)                                 | 15-35          | 37                                 | 0.07-0.15                  | 50-55                     |
| 536R-Cy3 <sup>2</sup>       | CAACGCTAACCCCTCCG         | <i>Rhodobacteraceae</i><br>(Family)             | 99.7 (99.1)                               | 35             | 37                                 | 0.07                       | 52                        |
| AC137-Cy3 <sup>3</sup>      | TGTTATCCCCCTCGCAA         | <i>Alteromonas</i><br>(Genus)                   | 91.4 (95.6)                               | 35             | 37                                 | 0.07                       | 52                        |
| CFB563-Cy3 <sup>4</sup>     | GGACCCTTTAAACCCAAT        | <i>Flavobacteriales</i><br>(Order)              | 97.7 (97.5)                               | 20             | 46                                 | 0.225                      | 48                        |
| 152R-Cy3 <sup>1</sup>       | ATTAGCACAAGTTTCCYCGTGT    | SAR11                                           | 98.7 (99.1)                               | 15             | 37                                 | 0.15                       | 55                        |
| 441R-Cy3 <sup>1</sup>       | TACAGTCATTTTCTTCCCCGAC    | (Family)                                        | 99.8 (99.6)                               |                |                                    |                            |                           |
| 542R-Cy3 <sup>1</sup>       | TCCGAACTACGCTAGGTC        | <i>Pelagibacter</i>                             | 99.9 (99.7)                               |                |                                    |                            |                           |
| 732R-Cy3 <sup>1</sup>       | GTCAGTAATGATCCAGAAAGYTG   | (Genus)                                         | 99.9 (99.8)                               |                |                                    |                            |                           |
| 103R-Cy3 <sup>5</sup>       | GTTACTCAGCCGTCTGCC        | SAR202                                          |                                           | 35             | 37                                 | 0.07                       | 57.5                      |
| 311R-Cy3 <sup>5</sup>       | TGTCTCAGTCCCCCTCTG        | <i>Chloroflexi</i><br>(Phylum)                  | 72.7 (96.0)<br>60.9 (87.7)<br>72.7 (84.7) |                |                                    |                            |                           |
| <b>Cren-537<sup>6</sup></b> | <b>TGACCACTTGAGGTGCTG</b> | <b><i>Thaumarchaeota</i></b><br><b>(Phylum)</b> | <b>99.9 (99.9)</b>                        | <b>20</b>      | <b>35</b>                          | <b>0.145</b>               | <b>37</b>                 |
| <b>Eury-806<sup>6</sup></b> | <b>CACAGCGTTTACACCTAG</b> | <b><i>Euryarchaeota</i></b><br><b>(Phylum)</b>  | <b>99.4 (99.3)</b>                        | <b>20</b>      | <b>35</b>                          | <b>0.145</b>               | <b>37</b>                 |

<sup>1</sup>Morris et al. 2002 <sup>2</sup>Parsons et al. 2011 <sup>3</sup>Parsons et al. 2015 <sup>4</sup>Weller et al. 2000 <sup>5</sup>Morris et al. 2005 <sup>6</sup>Teira et al. 2004; Herndl et al. 2005

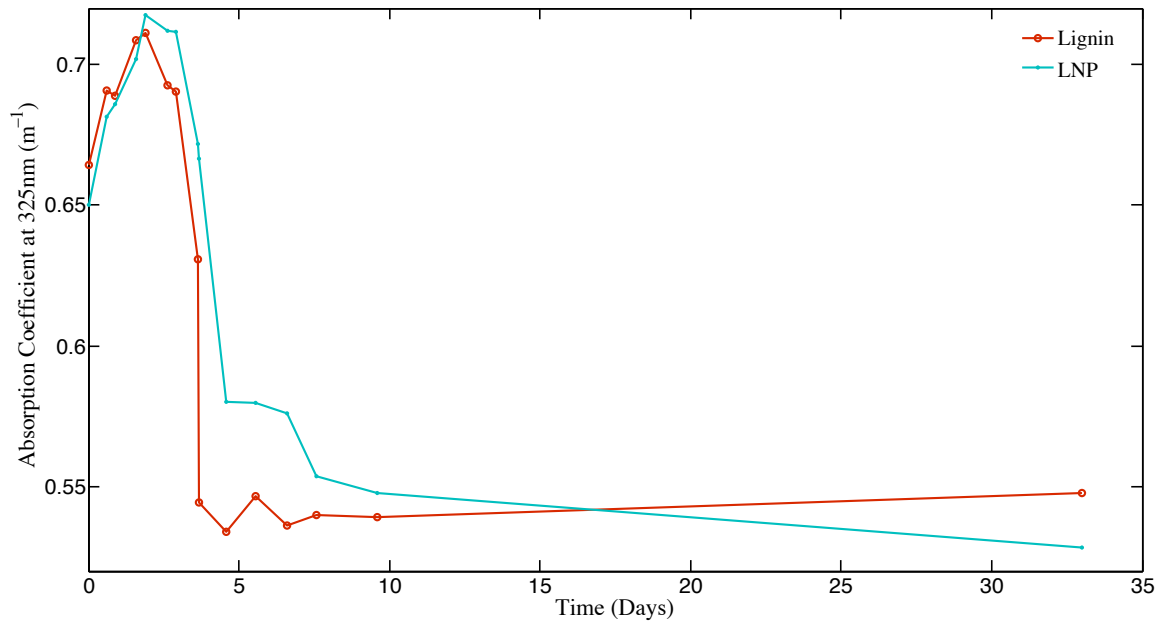

**Figure S1.** Changes in the CDOM absorption coefficient (m<sup>-1</sup>) at 325 nm for LNP (blue line with dots) and Lignin treatments (orange line with circles) over time, for the full 35 day incubation.

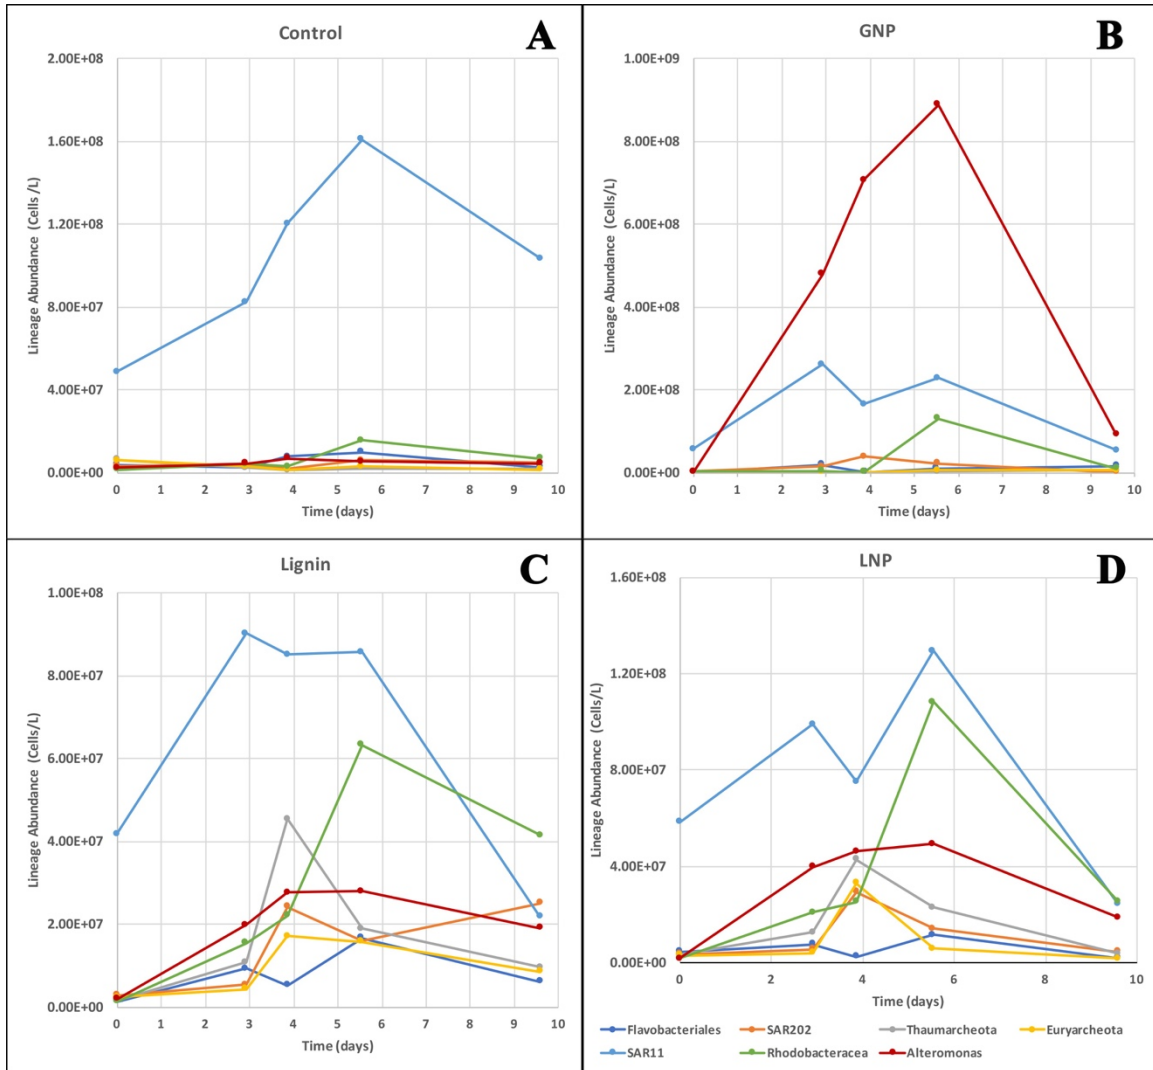

**Figure S2.** Changes in the absolute cell abundance (cells L<sup>-1</sup>) of targeted groups using FISH and CARD-FISH (Flavobacteriales, SAR202, Thaumarchaeota, Euryarchaeota, SAR11, Rhodobacteracea and *Alteromonas*) in each of the four treatments A) Control B) GNP C) Lignin and D) LNP, between days 0 and 10. Please note the change in the scale of the Y axis between treatments. See Figure 1 for total prokaryotic cell counts.
